# Supplementary material for: Local Emergence of a del HV69-70 SARS-CoV-2 Variant in Burgundy, France
Source: MDPI journal article supplement (doi:10.3390/pathogens11020124), 2022-01-20
Supplement: s1 [file s1]

A)

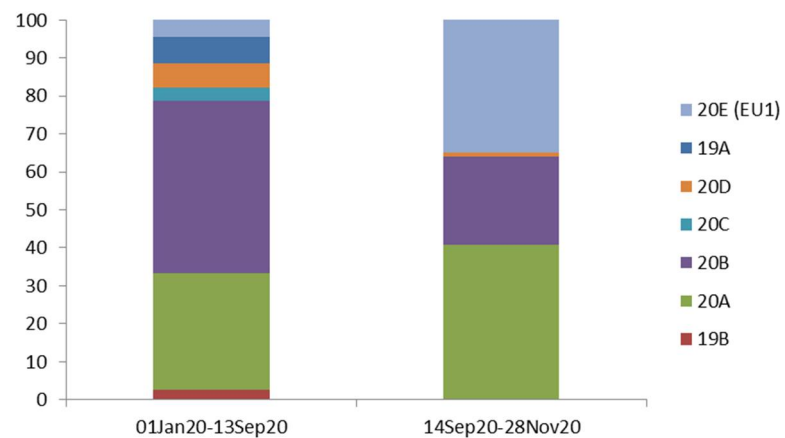

B)

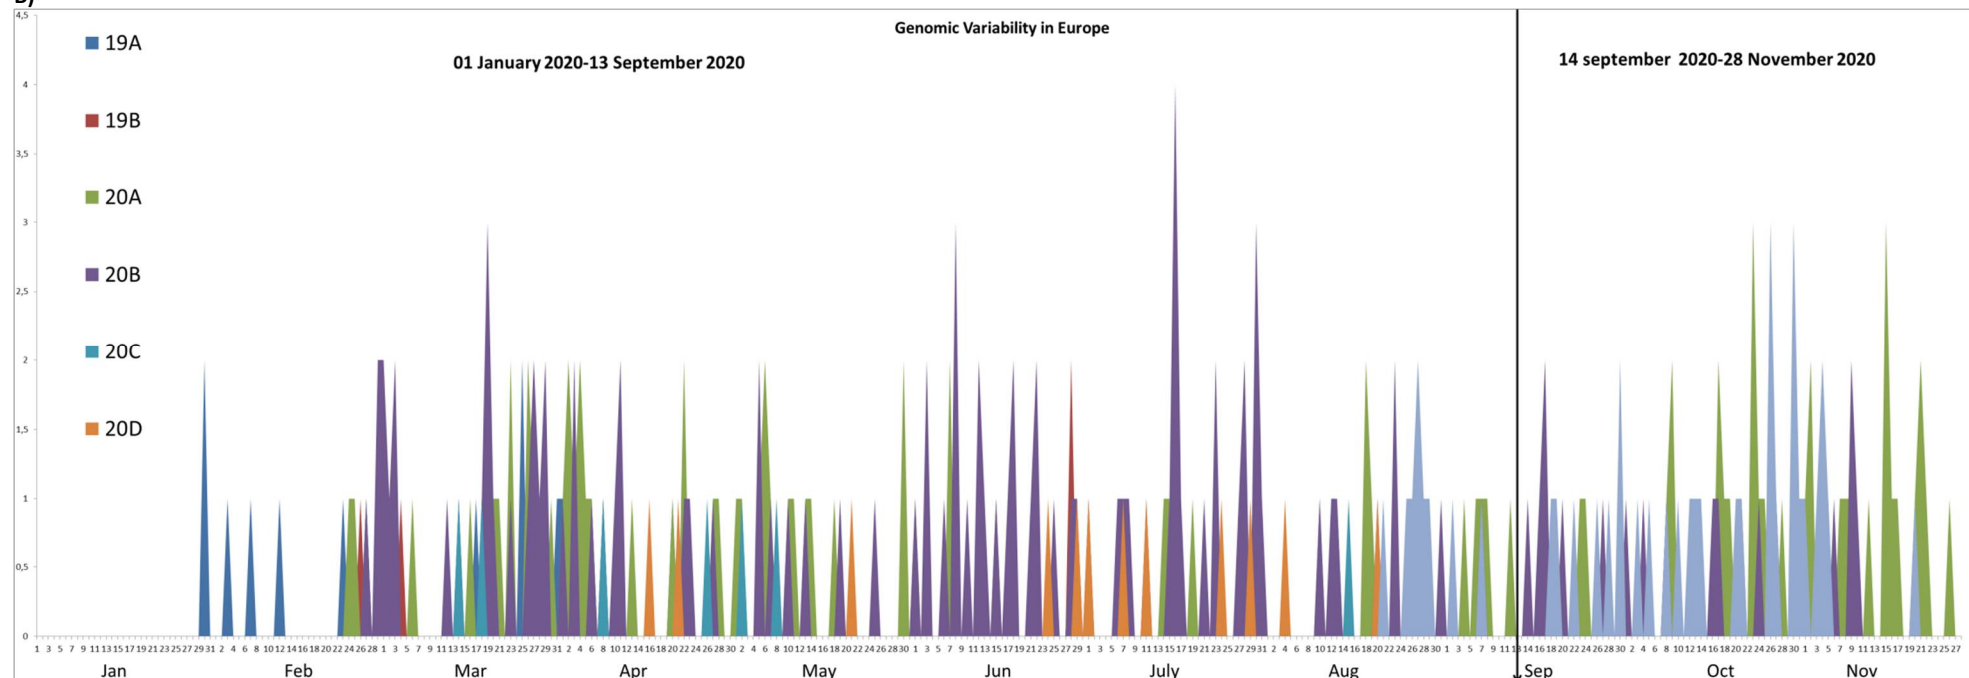

**Figure S3 Viral variability in Europe**

- Percentage distribution of clades among the randomly selected European SARS-CoV-2 strains, from December 2019 to mid-September 2020, before the study period and from mid-September to end of November 2020 , during the study period.
- Decrease in genomic variability over time
