# Supplementary material for: Local Emergence of a del HV69-70 SARS-CoV-2 Variant in Burgundy, France
Source: MDPI journal article supplement (doi:10.3390/pathogens11020124), 2022-01-20
Supplement: s1 [file s1]

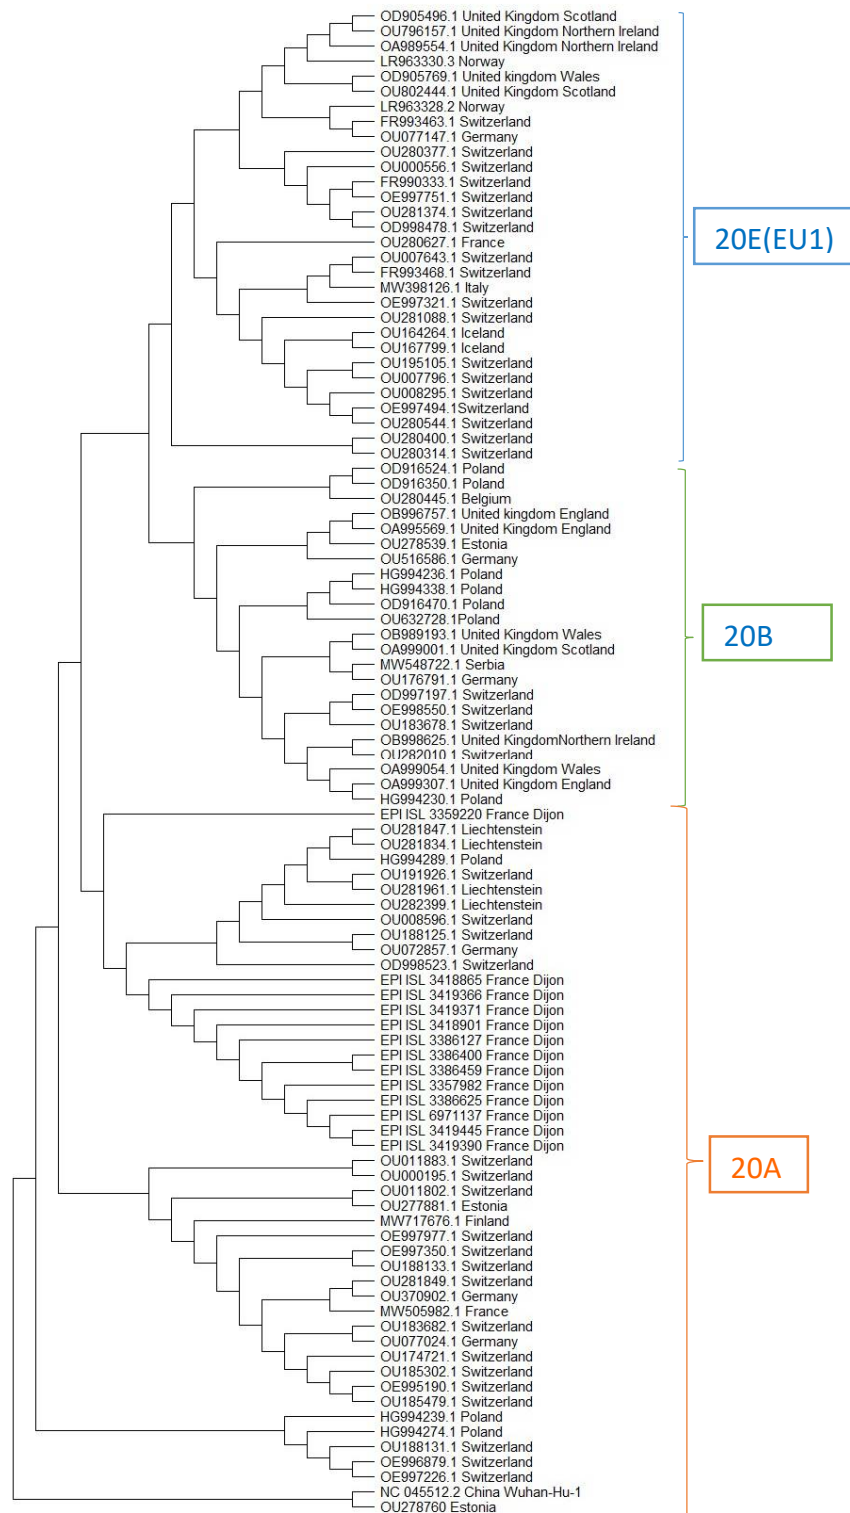

**Figure S4. Phylogenetic tree representing the relationship among the 13 SARS-CoV-2 sequences from Burgundy and 86 randomly selected genomes collected during the study period in Europe**

Using MegaX, genome sequences were first aligned with CLUSTAL and the relationship tree was established via maximum likelihood, with a bootstrap value of 500, followed by a rooting on Wuhan-Hu-1 sequence. SARS-CoV-2 strains randomly selected by Nextstrain are indicated by genbank accession number and country; SARS-CoV-2 strains presented in this study are indicated by GISAID accession number, Country (France) and town of RT-PCR analysis (Dijon): EPI\_ISL\_3357982; EPI\_ISL\_3359220; EPI\_ISL\_3386459; EPI\_ISL\_3386625; EPI\_ISL\_3386127 hCoV-19/France/VIP-1510/2020; EPI\_ISL\_3386400; EPI\_ISL\_3419445; EPI\_ISL\_3419366 EPI\_ISL\_3419390; EPI\_ISL\_3419371; EPI\_ISL\_3418865; EPI\_ISL\_3418901; EPI\_ISL\_6971137
