# Supplementary material for: Local Emergence of a del HV69-70 SARS-CoV-2 Variant in Burgundy, France
Source: MDPI journal article supplement (doi:10.3390/pathogens11020124), 2022-01-20
Supplement: s1 [file s1]

|                       | Spos |             | SGTF |             | <i>p</i> - value |
|-----------------------|------|-------------|------|-------------|------------------|
|                       | n=   | mean Ct     | n=   | mean Ct     |                  |
|                       | 444  | <b>23</b>   | 95   | <b>18,7</b> | p<0,000          |
|                       |      |             |      |             |                  |
| <b>Age (years)</b>    |      |             |      |             |                  |
| 0-20                  | 89   | <b>25,3</b> | 8    | <b>27,7</b> |                  |
| 20-60                 | 213  | <b>23</b>   | 26   | <b>18,4</b> | p<0,01           |
| 61-100                | 142  | <b>21,4</b> | 61   | <b>17,8</b> | p<0,01           |
| <b>Symptomatology</b> |      |             |      |             |                  |
| Symptomatic patients  | 248  | <b>20,9</b> | 32   | <b>18,6</b> |                  |
| Asymptomatic patients | 188  | <b>26</b>   | 55   | <b>19</b>   | p<0,000          |

**Table S1. Viral load**

The Ct values associated with Spos group and SGTF group were compared using 1-way analysis' test or Kruskal-Wallis' test. The viral load in the SGTF group was higher when compared to the Spos group. Of note, the differences were not statistically significant for 0-20 age group. Viral loads were higher for asymptomatic patients in the SGTF group compared to asymptomatic patients in the Spos group.
