# Supplementary material for: Local Emergence of a del HV69-70 SARS-CoV-2 Variant in Burgundy, France
Source: MDPI journal article supplement (doi:10.3390/pathogens11020124), 2022-01-20
Supplement: s1 [file s1]

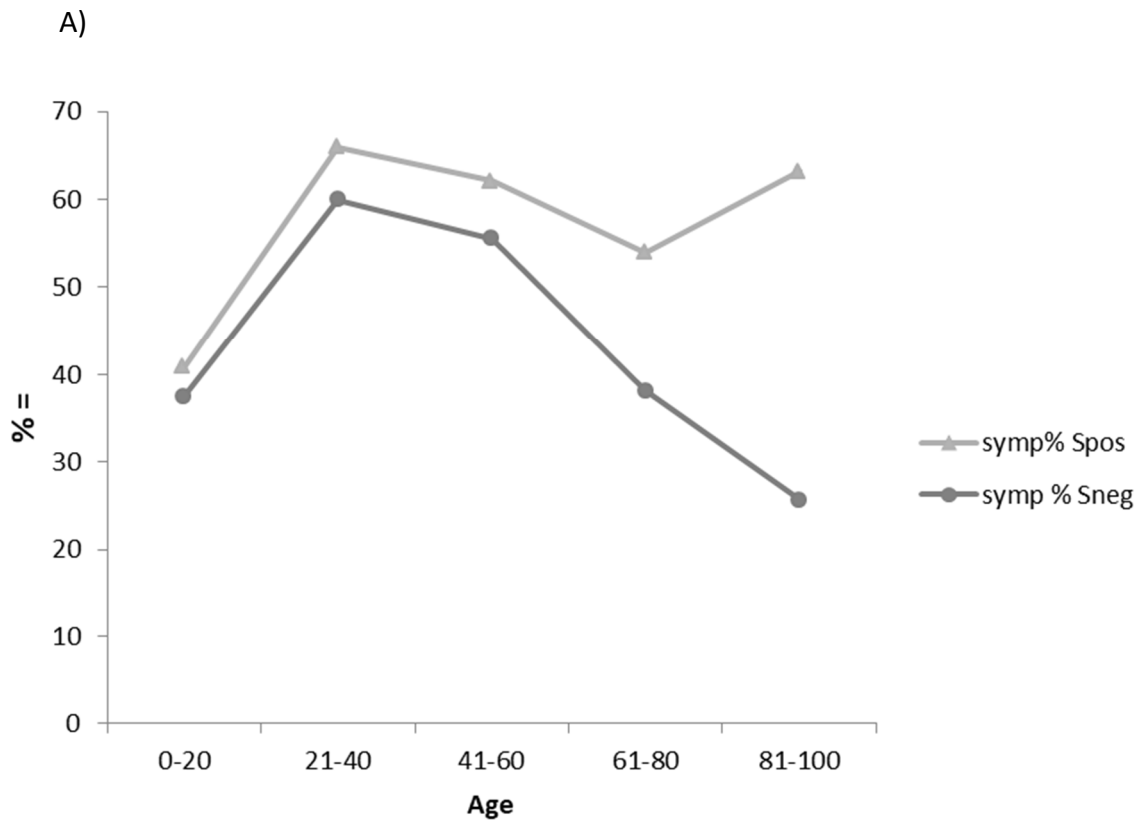

B)

| Age    | Spos (n=)   |              | SGTF (n=)   |              |
|--------|-------------|--------------|-------------|--------------|
|        | Symptomatic | Asymptomatic | Symptomatic | Asymptomatic |
| 0-20   | 36          | 52           | 3           | 5            |
| 21-40  | 62          | 32           | 6           | 4            |
| 41-60  | 72          | 44           | 5           | 5            |
| 61-80  | 54          | 46           | 8           | 13           |
| 81-100 | 24          | 17           | 9           | 29           |

**Figure S2 Percentage of Symptomatic patients according to age for Spos and SGTF samples from Montceau-les-Mines, Burgundy, France**

A) Percentage of symptomatic patients/ total

B) Number of symptomatic and asymptomatic patients and viral load in Spos and SGTF groups
