# Supplementary material for: Local Emergence of a del HV69-70 SARS-CoV-2 Variant in Burgundy, France
Source: Pathogens. 2022 Jan 20;11(2):124. doi: 10.3390/pathogens11020124 (PMC8875006; doi:10.3390/pathogens11020124)
Supplement: Supplementary file 1 [file pathogens-11-00124-s001.zip]

Archive with 5 entries (5 files):
- S1 pathogens .pdf
- S2 pathogens .pdf
- S3 pathogens.pdf
- S4 pathogen tree1401 .pdf
- Table S1.pdf
